# Supplementary material
Source: publisher figshare collection journal article supplement (https://springernature.figshare.com/ndownloader/files/31916725)
Supplement: Supplementary file [file 31916725]

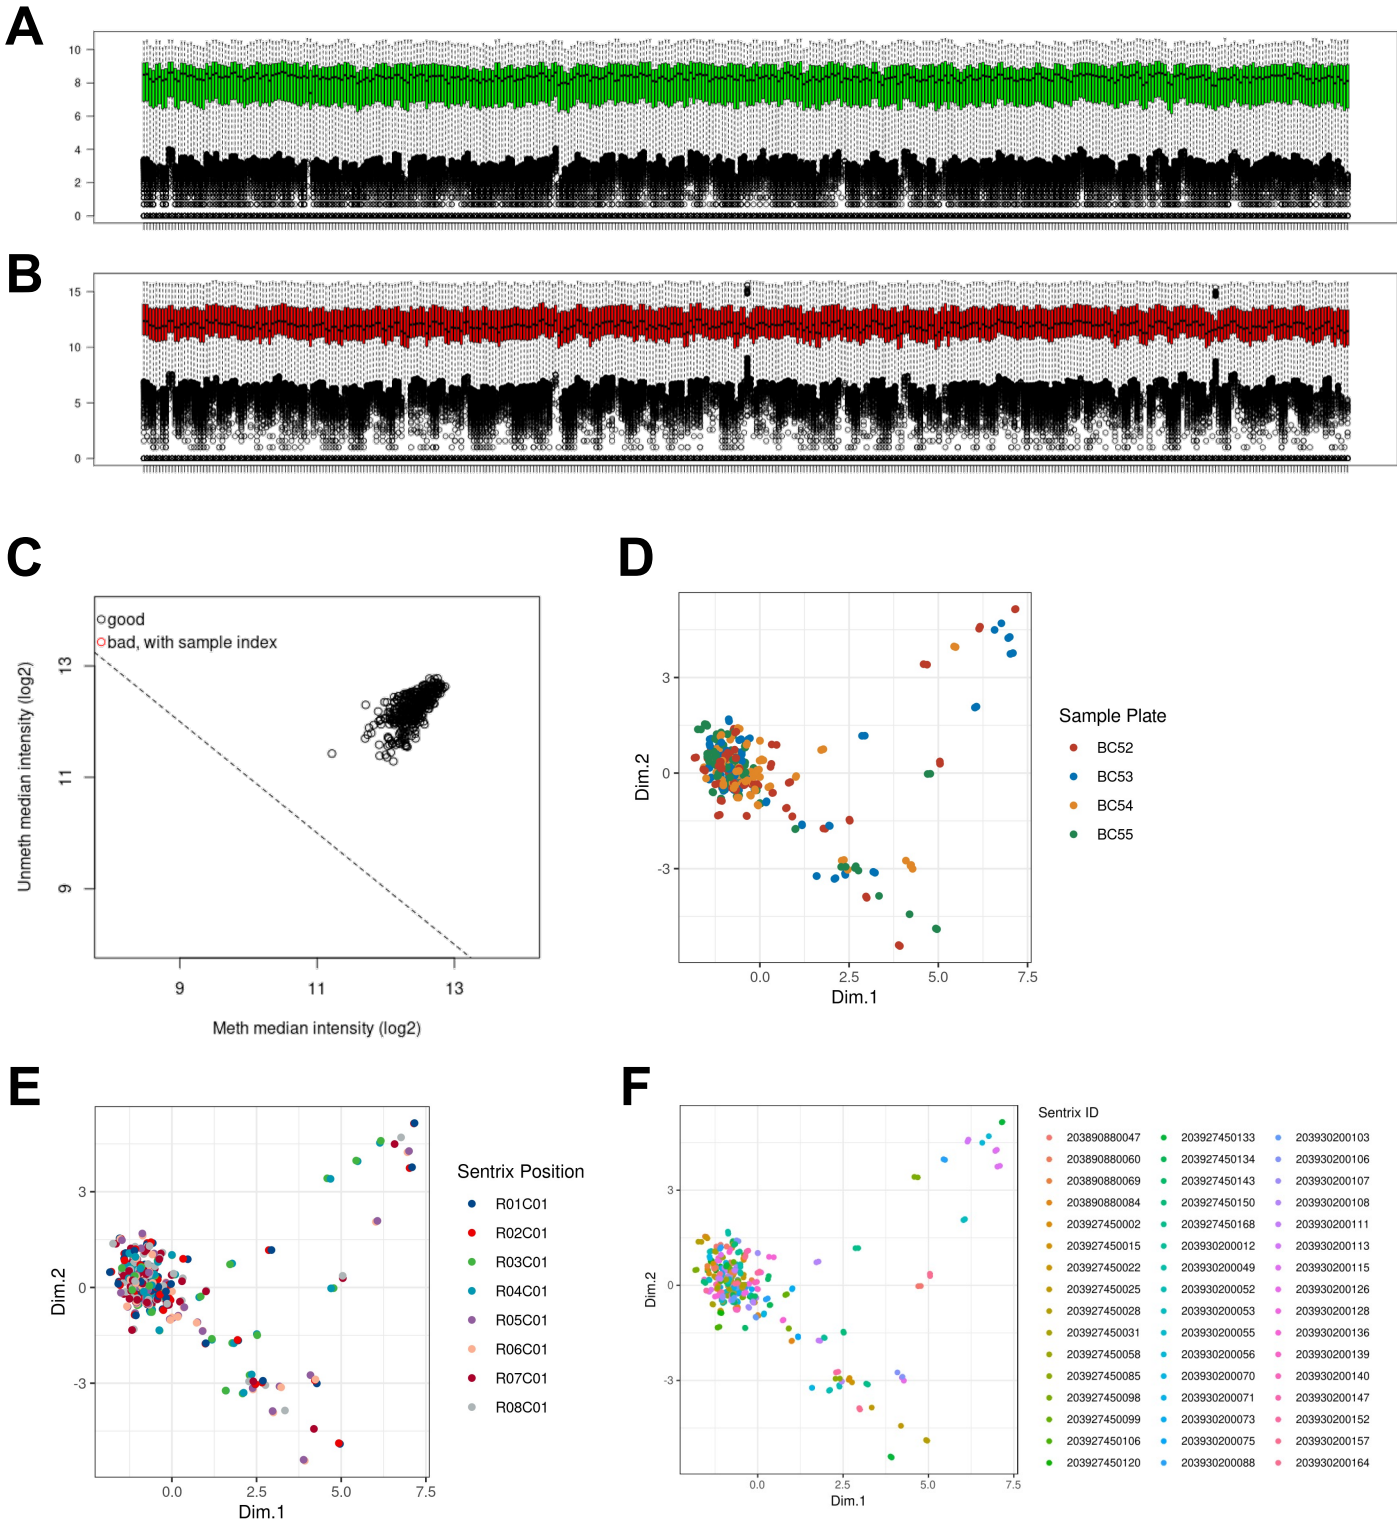

**Supplementary Figure 1. Quality control and the association between technical parameters and DNA methylation values.** Boxplots showing the spread of log<sub>2</sub> intensities in (A) green and (B) red channels across the samples analyzed. (C) QC plot of log<sub>2</sub> median intensities in the methylated (Meth) and unmethylated (Unmeth) channels. The cut-off for acceptable sample quality is denoted by the dashed diagonal line and demarcates the points where the average of red and green channel log<sub>2</sub> median intensities is 10.5. Multidimensional scaling plots of the top 2000 most variable probes in the filtered dataset colored by (D) sample plate, (E) sentrix position and (F) sentrix ID.
